# Supplementary material for: A framework for accelerated phototrophic bioprocess development: integration of parallelized microscale cultivation, laboratory automation and Kriging-assisted experimental design
Source: PubMed Central journal article supplement (PMC5282810; doi:10.1186/s13068-017-0711-6), 2017-01-31

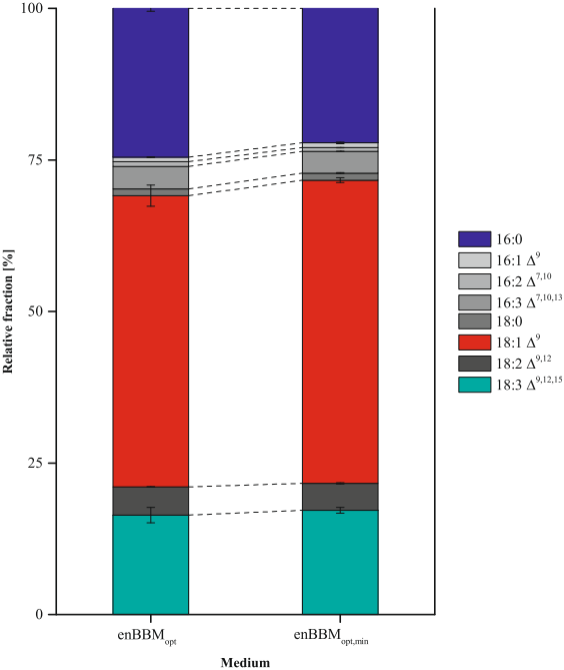

Supplement: 13068_2017_711_MOESM11_ESM.pdf [file 13068_2017_711_MOESM11_ESM.pdf]
